# Supplementary material for: Mononuclear copper(ii) complexes with 3,5-substituted-4-salicylidene-amino-3,5-dimethyl-1,2,4-triazole: synthesis, structure and potent inhibition of protein tyrosine phosphatases
Source: Royal Society of Chemistry journal article supplement (doi:10.1039/c1dt10169b), 2011-01-01
Supplement: c1dt10169b.pdf [file c1dt10169b.pdf]

## Supporting Information

# Mononuclear copper(II) complexes with 3,5-substituted-4-salicylideneamino-3,5-dimethyl-1,2,4-triazole: Synthesis, structure and potent inhibition of protein tyrosine phosphatases

*Ling Ma, Liping Lu<sup>\*</sup>, Miaoli Zhu<sup>\*</sup>, Qingming Wang, Ying Li, Shu Xing, Xueqi Fu<sup>\*</sup>, Zengqiang Gao, Yuhui Dong*

**Fig. S1** Fluorescence of HL1 in MOPS buffer (pH 7.2), [HL1]  $5.0 \times 10^{-5}$  M

**Fig. S2** Fluorescence of [Cu]/[HL1] in MOPS buffer (pH 7.2), [HL1]  $5.0 \times 10^{-6}$  M, from up to bottom [Cu]/[HL1] = 0, 0.2, 0.4, 0.6, 0.8, 1.0, 1.2, 1.4, 1.6, 1.8, 2.0, 2.2, 2.4, 2.6, 2.8, 3.0

**Fig. S3** Fluorescence of [HL1] in MOPS buffer (pH 7.2) was quenched by CuCl<sub>2</sub>., [HL1]  $5.0 \times 10^{-6}$  M, from up to bottom [Cu]/[HL1] = 0, 0.2, 0.4, 0.6, 0.8, 1.0, 1.2, 1.4, 1.6, 1.8, 2.0, 2.2, 2.4, 2.6, 2.8, 3.0

**Fig. S4** Fluorescence of [HL1] in MOPS buffer (pH 7.2) was quenched by CuCl<sub>2</sub>, [HL1]  $5.0 \times 10^{-6}$  M, from up to bottom [Cu]/[HL1] = 0, 0.2, 0.4, 0.6, 0.8, 1.0, 1.2, 1.4, 1.6, 1.8, 2.0, 2.2, 2.4, 2.6, 2.8, 3.0

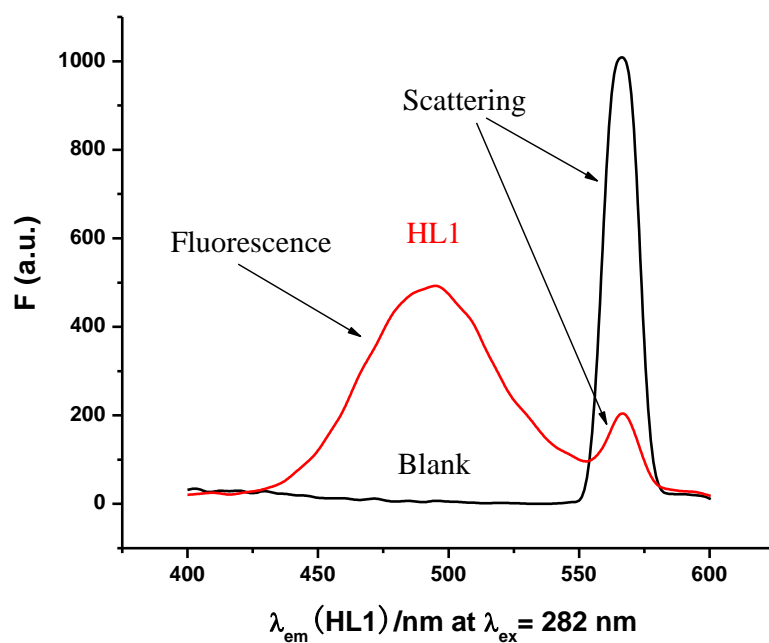

**Fig. S1** Fluorescence of HL1 in MOPS buffer (pH 7.2), [HL1]  $5.0 \times 10^{-5}$  M

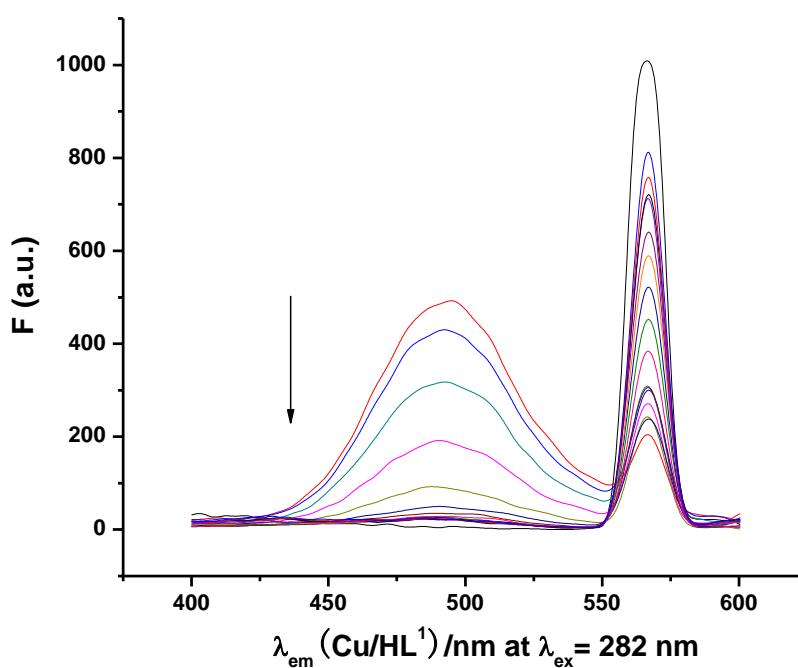

**Fig. S2** Fluorescence of [Cu]/[HL1] in MOPS buffer (pH 7.2), [HL1]  $5.0 \times 10^{-6}$  M, from up to bottom [Cu]/[HL1] = 0, 0.2, 0.4, 0.6, 0.8, 1.0, 1.2, 1.4, 1.6, 1.8, 2.0, 2.2, 2.4, 2.6, 2.8, 3.0

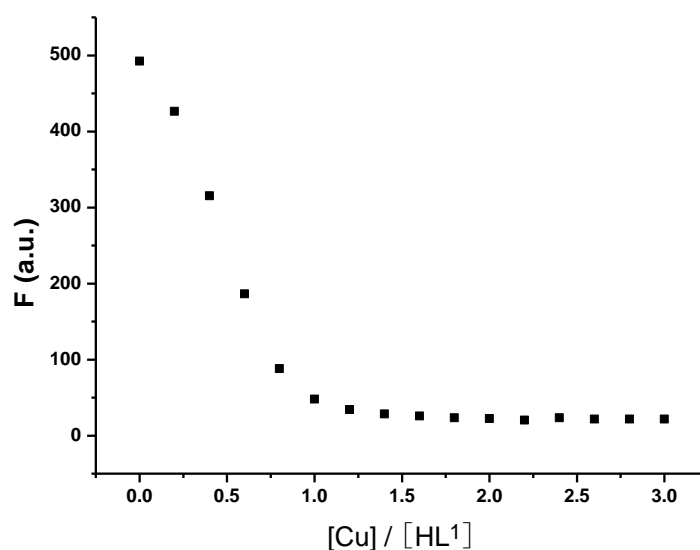

**Fig. S3** Fluorescence of [HL1] in MOPS buffer (pH 7.2) was quenched by  $\text{CuCl}_2$ , [HL1]  $5.0 \times 10^{-6}$  M, from up to bottom [Cu]/[HL1] = 0, 0.2, 0.4, 0.6, 0.8, 1.0, 1.2, 1.4, 1.6, 1.8, 2.0, 2.2, 2.4, 2.6, 2.8, 3.0

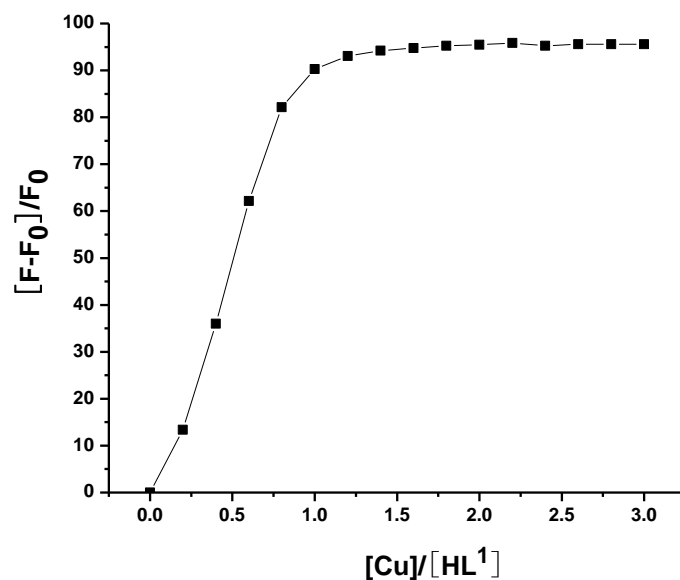

**Fig. S4** Fluorescence of [HL1] in MOPS buffer (pH 7.2) was quenched by  $\text{CuCl}_2$ , [HL1]  $5.0 \times 10^{-6}$  M, from up to bottom [Cu]/[HL1] = 0, 0.2, 0.4, 0.6, 0.8, 1.0, 1.2, 1.4, 1.6, 1.8, 2.0, 2.2, 2.4, 2.6, 2.8, 3.0
